# Supplementary material for: Progressive p-channel vertical transistors fabricated using electrodeposited copper oxide designed with grain boundary tunability
Source: Royal Society of Chemistry journal article supplement (doi:10.1039/d1mh01568k), 2021-12-11
Supplement: d1mh01568k1.pdf [file d1mh01568k1.pdf]

# Supporting Information

## *Progressive p-channel vertical transistors using electrodeposited copper oxide designed with grain boundary tunability*

*Sung Hyeon Jung, Ji Sook Yang, Young Been Kim, Nishad G. Deshpande, Dong Su Kim, Ji Hoon Choi, Hee Won Suh, Hak Hyeon Lee, and Hyung Koun Cho\**

\* Corresponding author: H. K. Cho; e-mail ([chohk@skku.edu](mailto:chohk@skku.edu))

### Table of Content

Figure S1 Crystal structure analysis using XRD and TEM of Cu<sub>2</sub>O and Sb-doped Cu<sub>2</sub>O, and their hall effect measurement

Figure S2 Transfer curve and the performance of the transistor based on channel thickness

Figure S3 Output curves of *p*-type Cu<sub>2</sub>O vertical transistors with different channel thicknesses

Figure S4 Reproducibility and reliability of *p*-Cu<sub>2</sub>O vertical transistors

Figure S5 Stability tests performance for the Sb doped Cu<sub>2</sub>O transistors

Figure S6 Transfer, output curve and stability tests of *n*-type IGZO TFTs

Figure S7 Power consumption characteristics of the CMOS inverter

Figure S8 Schematic diagram of our CMOS inverter using *p*-Cu<sub>2</sub>O vertical TFT and *n*-IGZO TFT.

Table S1 Comparative electrical properties of thin film transistor using *p*-type oxide semiconductors

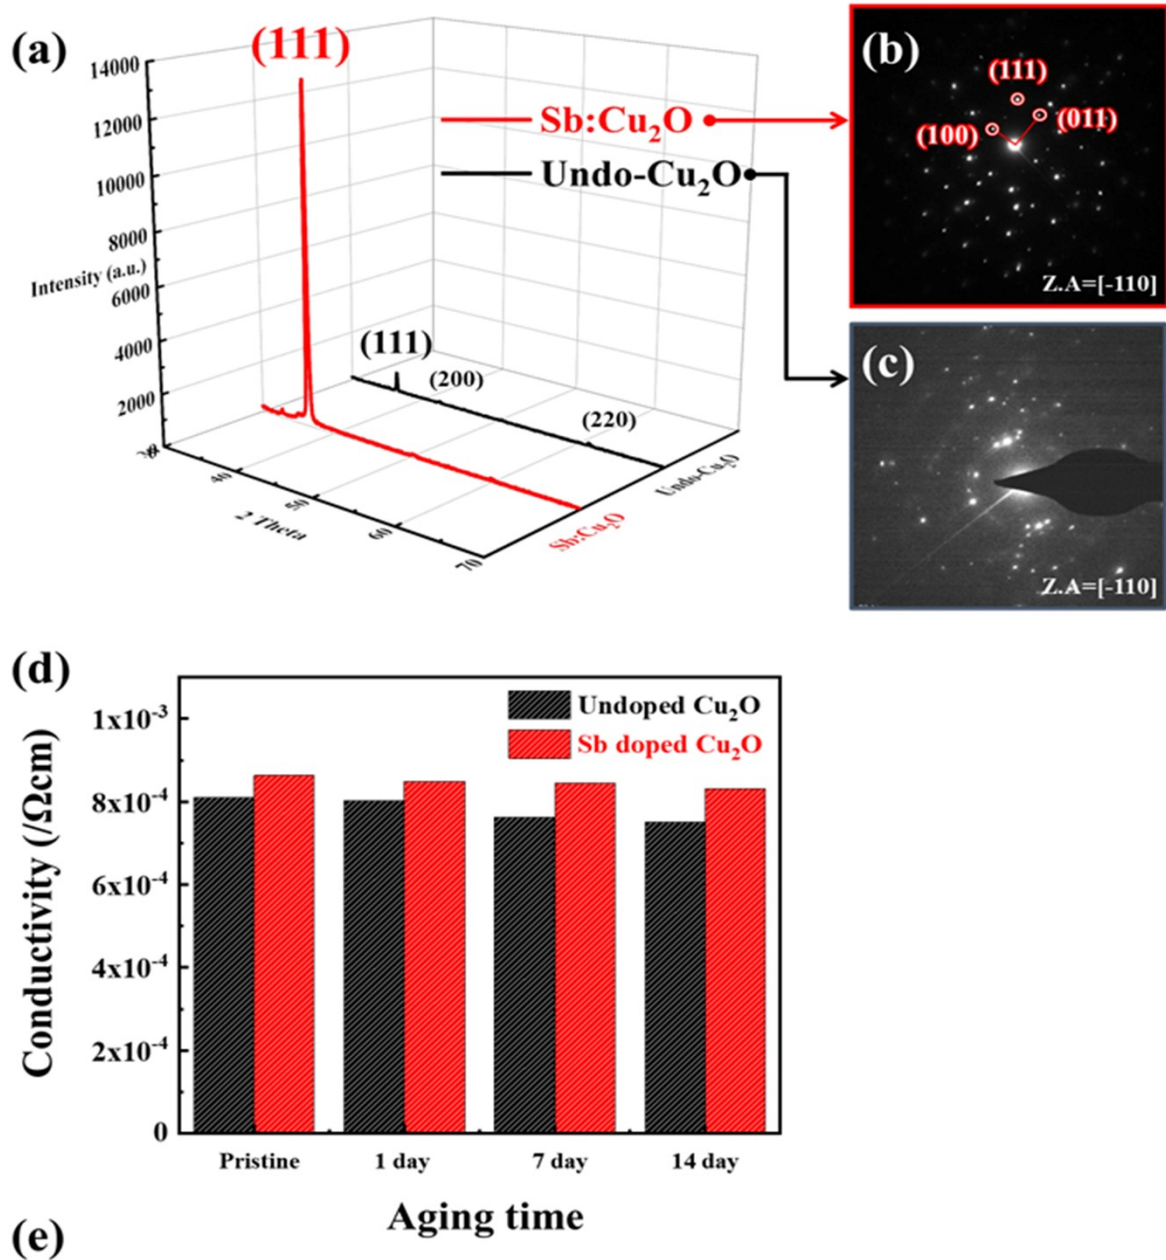

**Figure S1.** (a) XRD pattern of undoped Cu<sub>2</sub>O lower intensity random oriented grains and Sb:Cu<sub>2</sub>O strong intensity along [111] preferred orientation, (b),(c) Selected area diffraction patterns obtained from Sb:Cu<sub>2</sub>O and undoped Cu<sub>2</sub>O films, respectively, (d) shows comparative aging time histogram of undoped Cu<sub>2</sub>O and Sb:Cu<sub>2</sub>O for 14 days' time duration, and (e) hall-effect measurements.

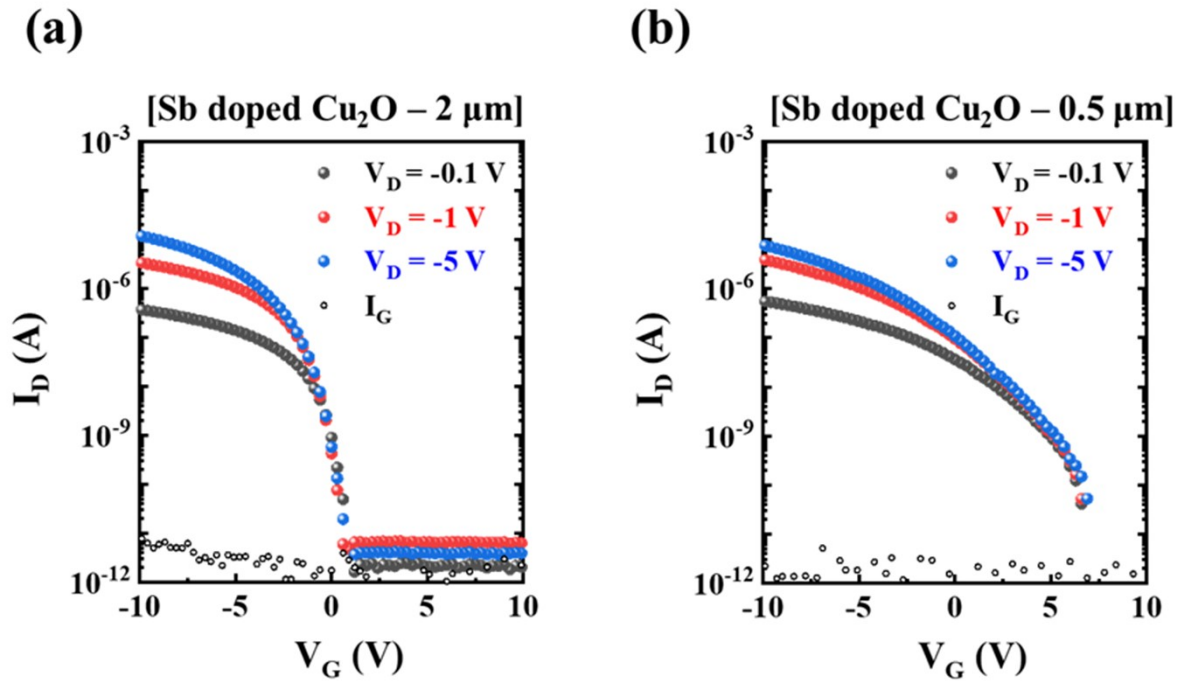

**Figure S2.** Shows transfer curve and the performance of the transistor based on channel thickness, (a) transfer curve of Sb doped  $\text{Cu}_2\text{O}$  for 2  $\mu\text{m}$  thickness, and (b) transfer curve of Sb doped  $\text{Cu}_2\text{O}$  for 0.5  $\mu\text{m}$  thickness.

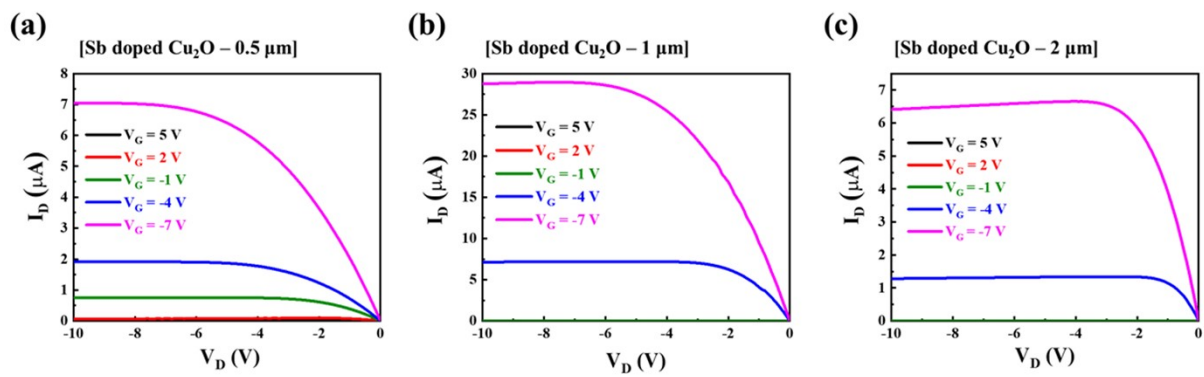

**Figure S3.** Output curves of *p*-type Cu<sub>2</sub>O vertical transistors with different channel thicknesses: (a) 0.5  $\mu\text{m}$ , (b) 1  $\mu\text{m}$ , and (c) 2  $\mu\text{m}$ .

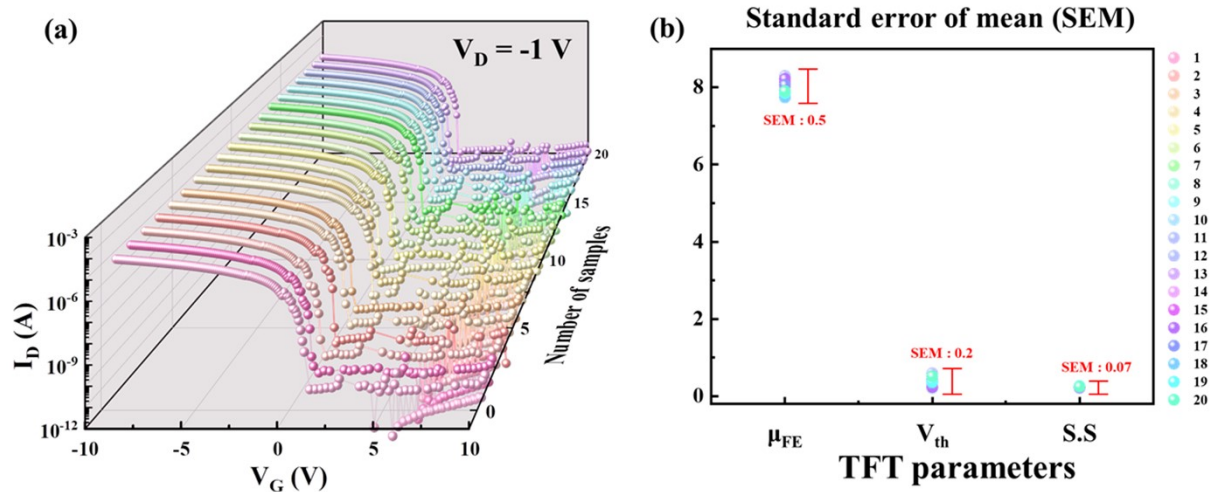

**Figure S4.** Reproducibility and reliability of  $p$ -Cu<sub>2</sub>O vertical transistors from 20 devices (a) transfer curve, and (b) Standard error of mean and variance of transistor parameters.

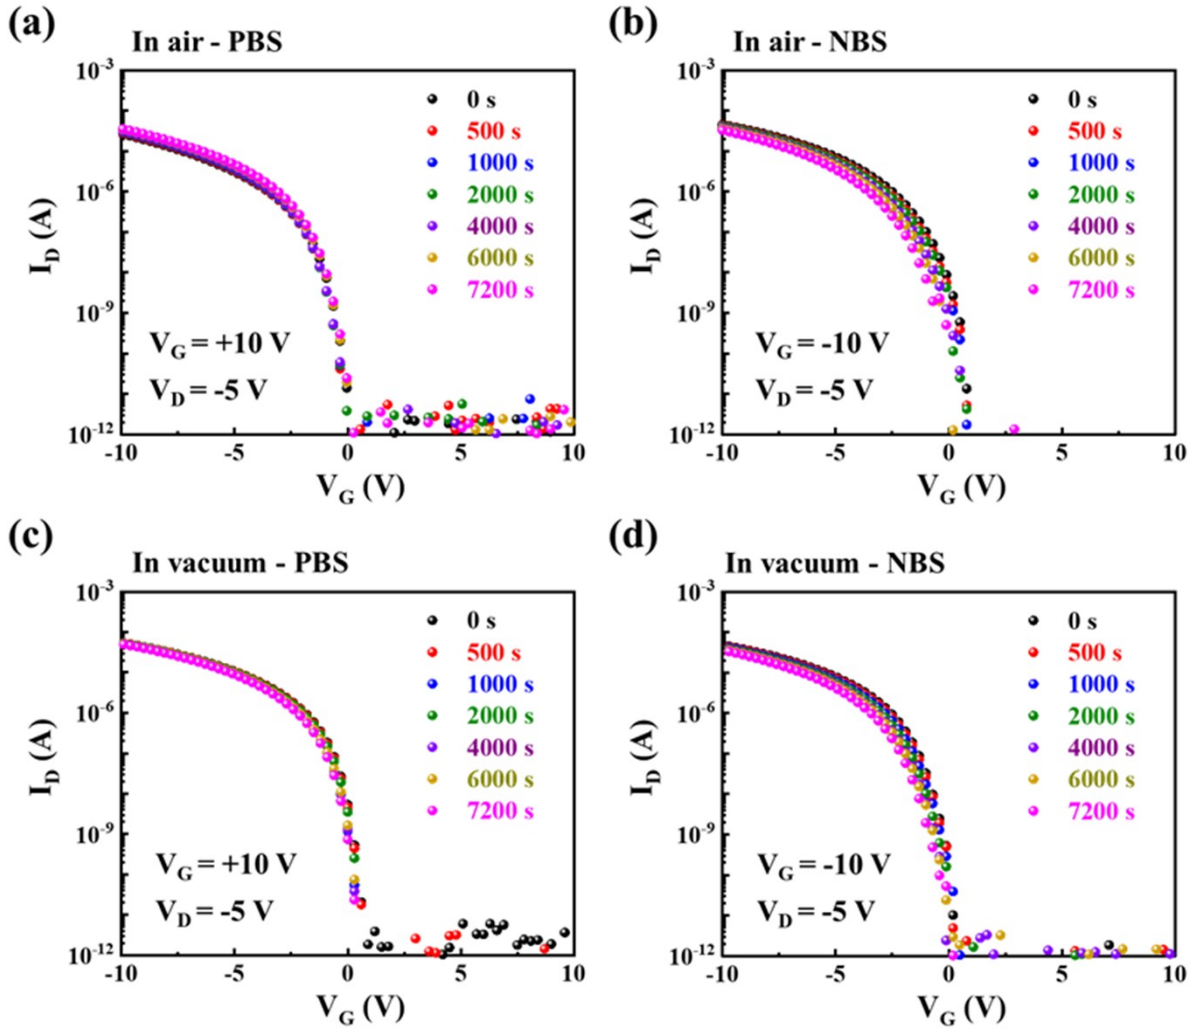

**Figure S5.** Shows stability tests performance for the Sb doped  $\text{Cu}_2\text{O}$  transistor in air and vacuum environment, (a) positive bias test in air environment, (b) negative bias test in air environment, (c) positive bias test in vacuum environment, and (d) negative bias stress test vacuum environment.

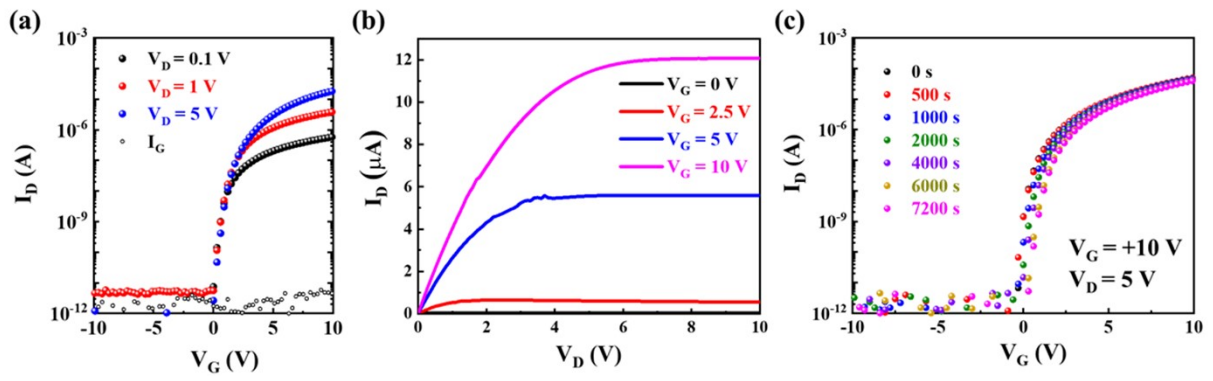

**Figure S6.** Electrical properties of *n*-type IGZO TFTs: (a) transfer curve, (b) output curve, and (c) positive bias stability tests at  $V_G = 10$  V and  $V_D = 5$  V for 2 h in air atmosphere.



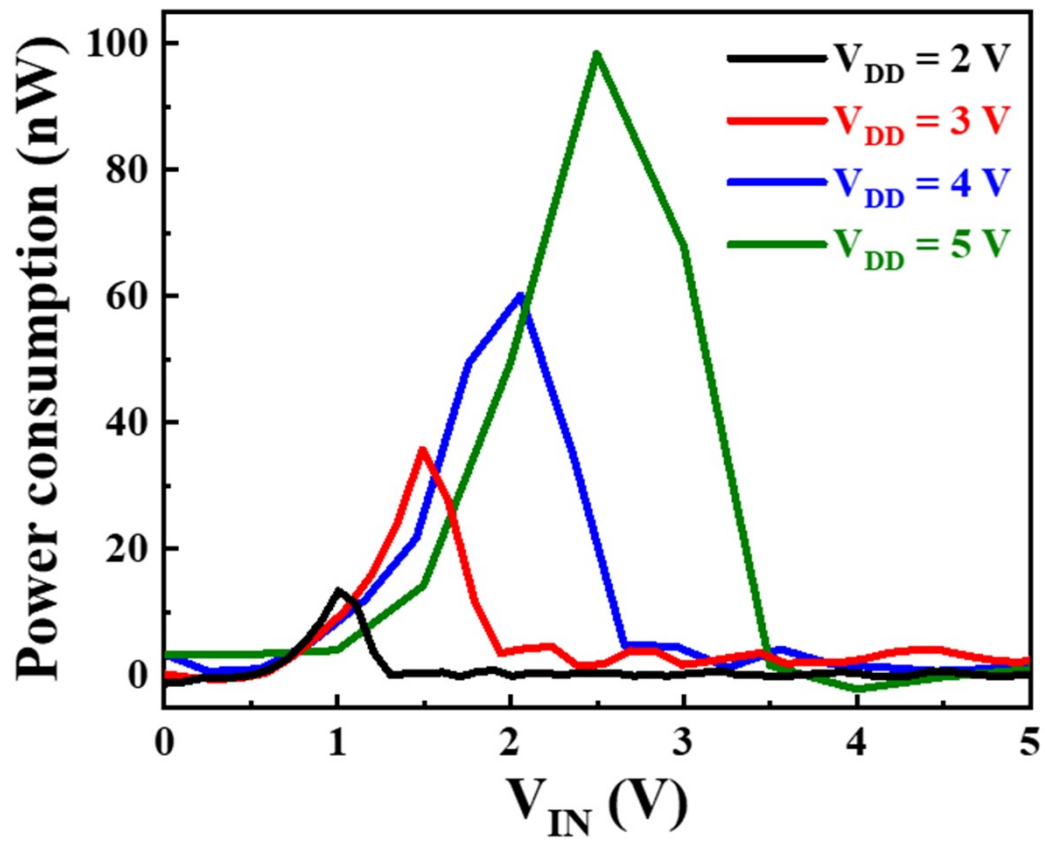

**Figure S7.** Power consumption characteristics of the CMOS inverter for  $V_{DD} = 2, 3, 4,$  and  $5$  V.

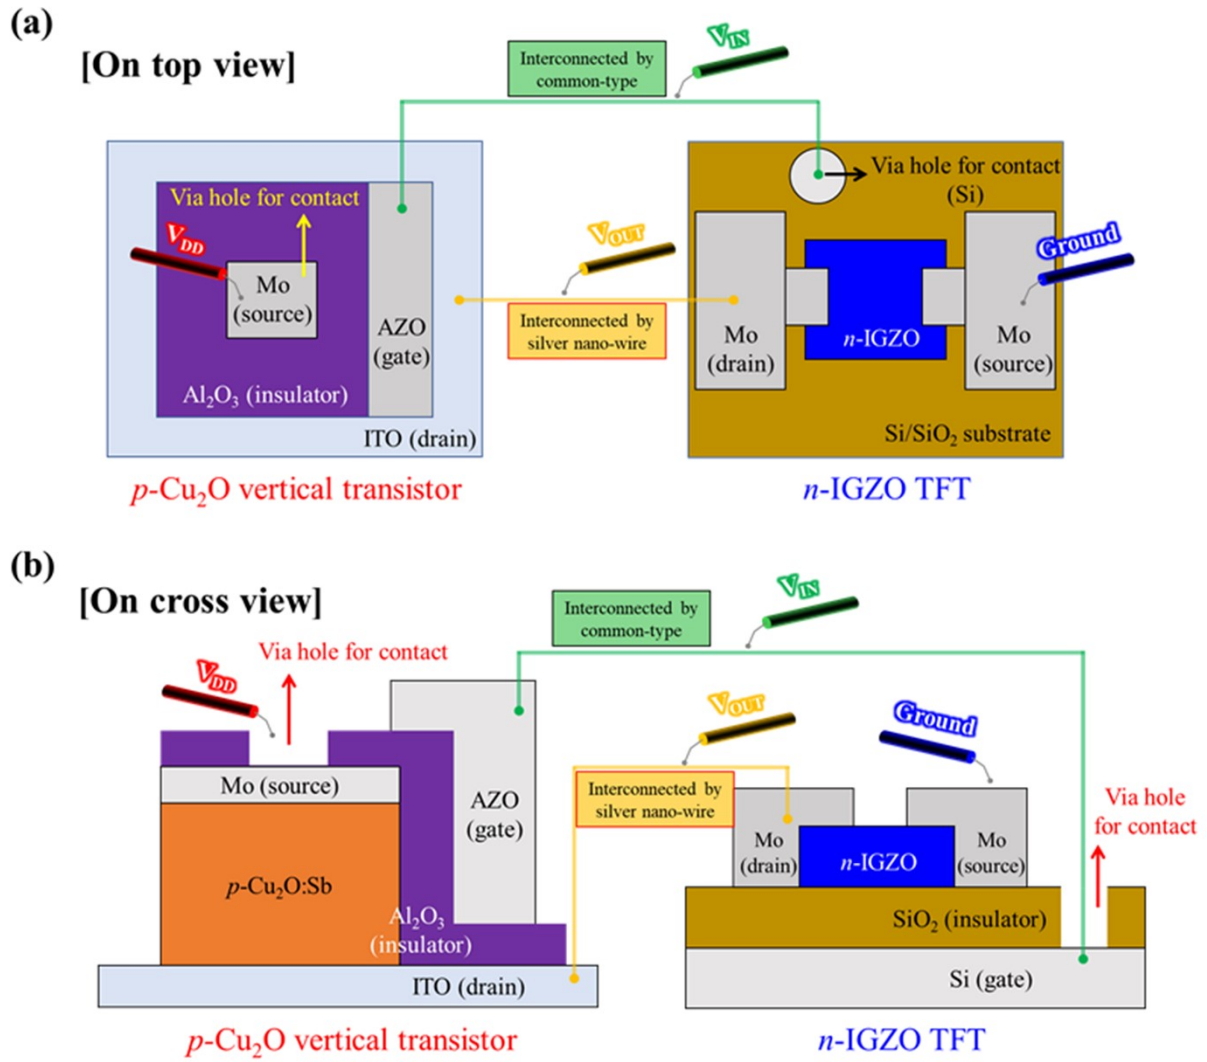

**Figure S8.** Schematic of our CMOS inverter using  $p-Cu_2O$  vertical TFT and  $n-IGZO$  TFT. (a) Top-view and (b) cross-view of the structure.

**Table S1.** Comparative electrical properties of thin film transistor using *p*-type oxide semiconductors.

| Material               | $V_{th}$ (V)     | S.S (V/dec)     | $\mu_{FE}$ (cm <sup>2</sup> /Vs) | $I_{on}/I_{off}$                  | Ref.            |
|------------------------|------------------|-----------------|----------------------------------|-----------------------------------|-----------------|
| <b>Cu<sub>2</sub>O</b> | <b>0.4</b>       | <b>0.24</b>     | <b>8</b>                         | <b><math>2 \times 10^8</math></b> | <b>Our work</b> |
| SnO <sub>x</sub>       | -1.3             | 1.7             | 0.8                              | $8.1 \times 10^3$                 | 1               |
| Ga:Cu <sub>2</sub> O   | -4.56            | 7.72            | 0.74                             | $1.06 \times 10^3$                | 2               |
| Cu <sub>x</sub> O      | -                | 0.11            | 0.75                             | $2.81 \times 10^8$                | 3               |
| SnO                    | ~1.2             | ~10             | ~1.4 - 1.8                       | $10^5$                            | 4               |
| Cu <sub>2</sub> O      | $-8.83 \pm 1.99$ | $2.35 \pm 1.22$ | -                                | $4.1 \times 10^6$                 | 5               |
| Cu <sub>2</sub> O      | -13.0            | 29.2            | $1.5 \times 10^{-3}$             | $5 \times 10^3$                   | 6               |
| Cu <sub>2</sub> O      | 0.3              | 0.137           | 2.7                              | $1.5 \times 10^6$                 | 7               |
| SnO                    | -1               | -               | 6.75                             | $6 \times 10^3$                   | 8               |
| SnO                    | -0.71            | 0.143           | 6.54                             | $> 10^5$                          | 9               |
| Cu <sub>2</sub> O      | -1.88            | 0.75            | 5.64                             | $1.79 \times 10^5$                | 10              |
| Cu <sub>2</sub> O      | -                | 0.19            | 2.7                              | $2 \times 10^5$                   | 11              |
| SnO                    | -                | 0.14            | 7.6                              | $3 \times 10^4$                   | 12              |

### Reference in supporting information

1. H.-S. Jeong, M.-J. Park, S.-H. Kwon, H.-J. Joo and H.-I. Kwon, *Sens. Actuators B Chem.*, 2019, **288**, 625-633.
2. J. H. Bae, J. H. Lee, S. P. Park, T. S. Jung, H. J. Kim, D. Kim, S.-W. Lee, K.-S. Park, S. Y. Yoon, I. B. Kang and H. J. Kim, *ACS Appl. Mater. Interfaces.*, 2020, **12**, 38350-38356.
3. W. K. Min, S. P. Park, H. J. Kim, J. H. Lee, K. Park, D. Kim, K. W. Kim and H. J. Kim, *ACS Appl. Mater. Interfaces.*, 2020, **12**, 24929-24939.
4. A. W. Lee, D. Le, K. Matsuzaki and K. Nomura, *ACS Appl. Electron. Mater.*, 2020, **2**, 1162-1168.
5. H. Chang, C. -H. Huang, K. Matsuzaki and K. Nomura, *ACS Appl. Mater. Interfaces.*, 2020, **12**, 51581-51588.
6. M. Napari, T. N. Huq, D. J. Meeth, M. J. Heikkila, K. M. Niang, H. Wang, T. Iivonen, H. Wang, M. Leskela, M. Ritala, A. J. Flewitt, R. L. Z. Hoye and J. L. MacManus-Driscoll, *ACS Appl. Mater. Interfaces.*, 2021, **13**, 4156-4164.
7. X. Zou, G. Fang, J. Wan, X. He, H. Wang, N. Liu, H. Long and X. Zhao, *IEEE Trans Electron Devices.*, 2011, **58**, 2003-2007.
8. J. A. Caraveo-Frescas, P. K. Nayak, H. A. Al-Jawhari, D. B. Granato, U. Schwingenschlogl and H. N. Alshareef, *ACS Nano.*, 2013, **7**, 5160-5167.
9. C.-W. Zhong, H.-C. Lin, K.-C. Liu and T.-Y. Huang, *IEEE Electron Device Lett.*, 2015, **36**, 1053-1055.
10. W. Maeng, S.-H. Lee, J.-D. Kwon, J. Park and J.-S. Park, *Ceram.*, 2016, **42**, 5517-5522.

11. A. Liu, S. Nie, G. Liu, H. Zhu, C. Zhu, B. Shin, E. Fortunato, R. Martinse and F. Shan, *J. Mater. Chem. C.*, 2017, **5**, 2524-2530.
12. C. W. Shih, A. Chin, C. F. Lu and W. F. Su, *Sci.*, 2018, **8**, 889.
